# Supplementary material for: Biosafety study and mechanism comparison on two types of silica with different nanostructures
Source: Royal Society of Chemistry journal article supplement (doi:10.1039/c7tx00076f), 2017-01-01
Supplement: c7tx00076f1.pdf [file c7tx00076f1.pdf]

## Supporting Information

### Biosafety study and mechanism comparison on two types of silica with different nanostructures

Yang Zhang <sup>\*a</sup>, Xianhui Chen<sup>‡a</sup>, Bo Zhao<sup>1</sup>, Hounan Wu<sup>b</sup>, Lan Yuan<sup>b</sup>, Hua Zhang<sup>a</sup>, Wenbing Dai<sup>a</sup>, Bing He<sup>a</sup>, Gengmei Xing<sup>c</sup>, Qiang Zhang<sup>a,d</sup>, Xueqing Wang<sup>\*a</sup>

#### Affiliations:

- a. Beijing Key Laboratory of Molecular Pharmaceutics and New Drug Delivery Systems, School of Pharmaceutical Sciences, Peking University, Beijing 100191, China
- b. Medical and Healthy Analytical Center, Peking University, Beijing 100191, China
- c. CAS Key Laboratory for Biomedical Effects of Nanomaterial & Nanosafety, Institute of High Energy Physics, Chinese Academy of Science (CAS), Beijing 100049, China
- d. State Key Laboratory of Natural and Biomimetic Drugs, Peking University, Beijing 100191, China

\* Corresponding author:

Xueqing Wang, Tel: +86-10-82805935; E-mail address: [wangxq@bjmu.edu.cn](mailto:wangxq@bjmu.edu.cn).

‡ These authors contributed equally to this work.

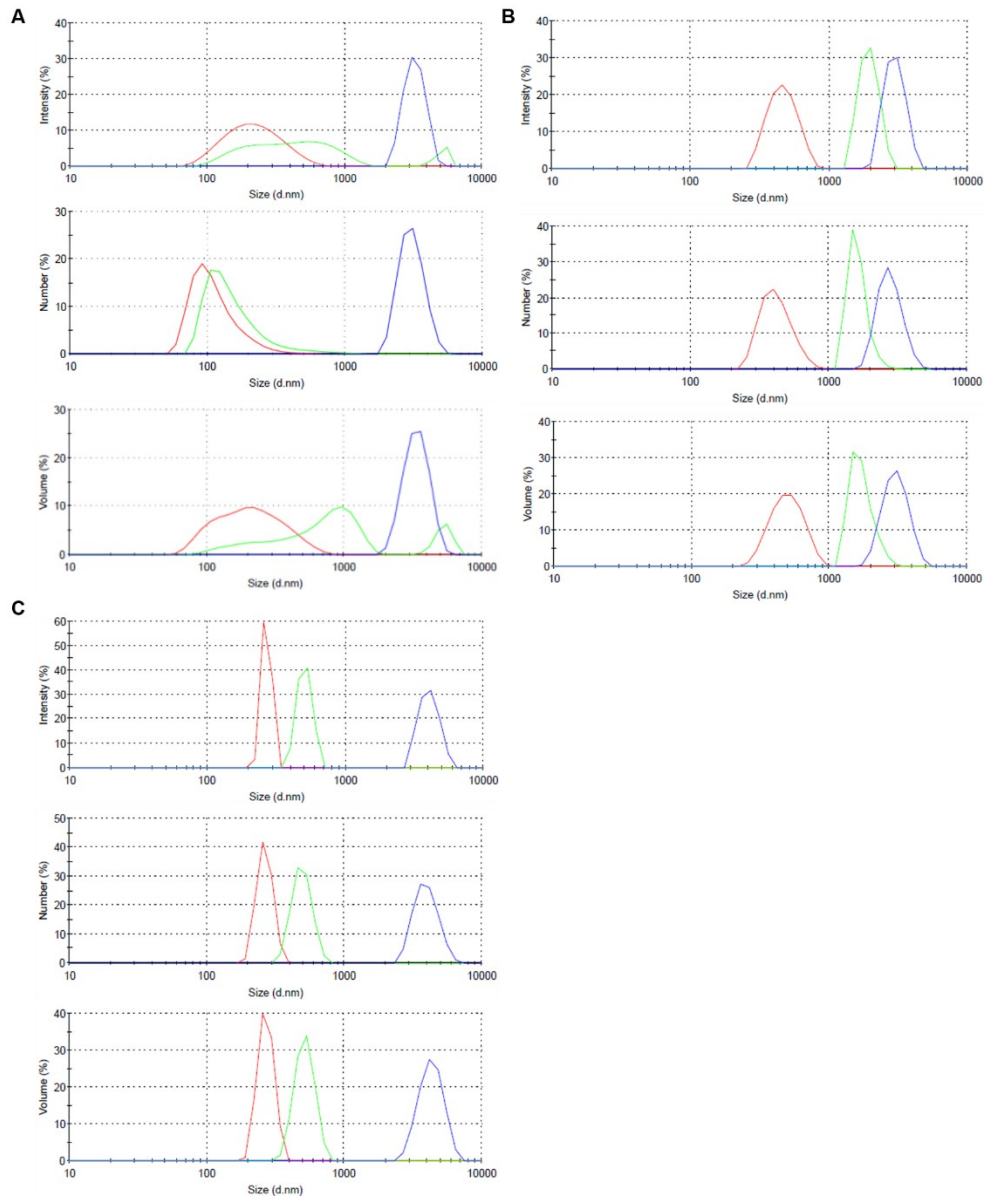

**Fig. S1 Particle size of A200 and S350 in (A) water, (B) PBS and (C) DMEM.** The size distribution of A200 at 0 h (red) and 3 h (green) and the distribution of S350 at 0 h (blue) were revealed by the particles' intensity, number and volume, respectively.

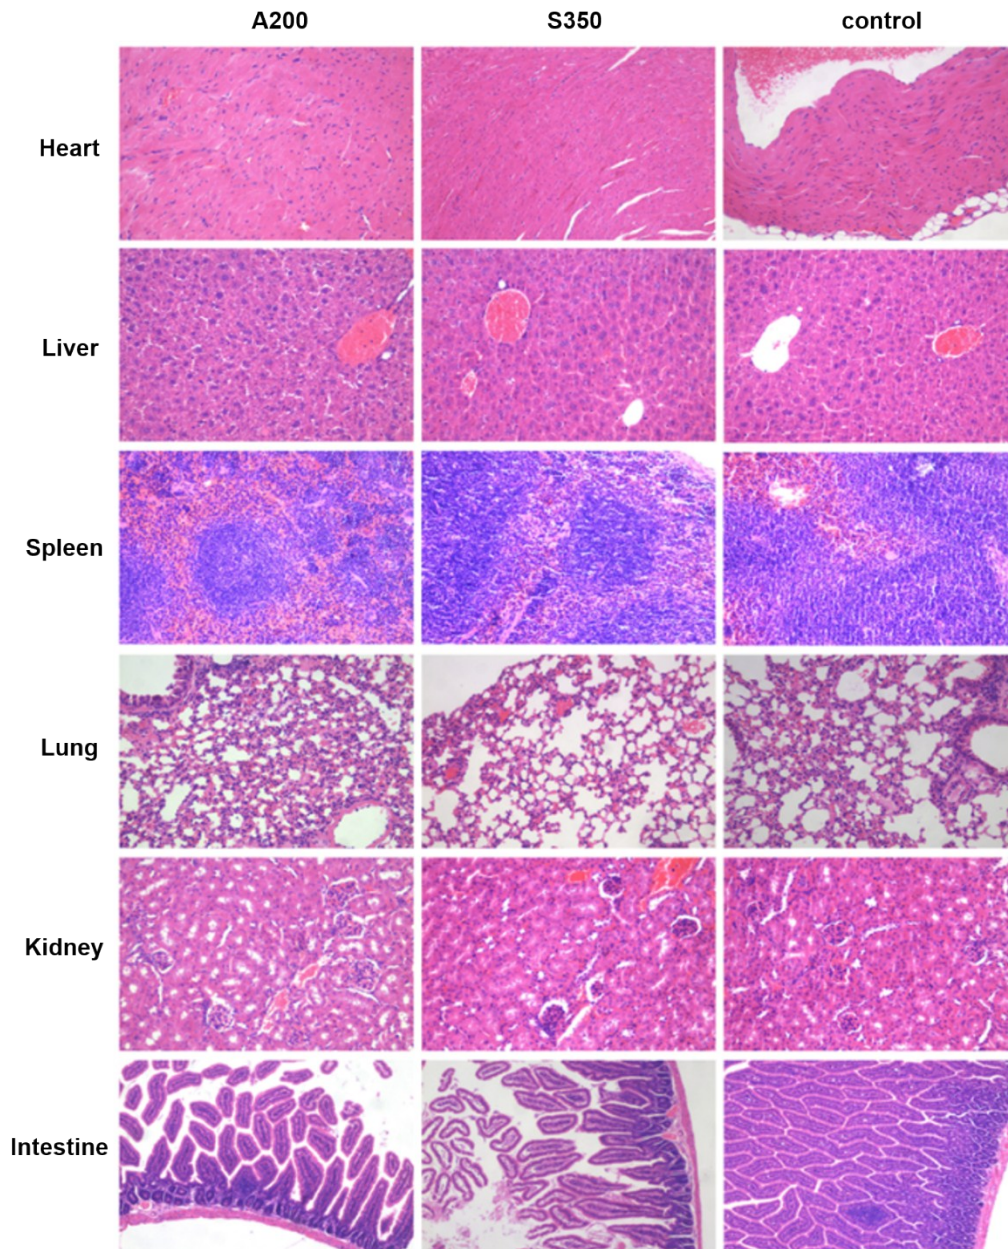

**Fig. S2** Histological observations of the mice after an intragastric administration of A200 and S350. An intragastric administration of deionized water served as a control. The observations were made under 400× magnification.
